# Supplementary material for: Staphylococcal phages and pathogenicity islands drive plasmid evolution
Source: PubMed Central journal article supplement (PMC8494744; doi:10.1038/s41467-021-26101-5), 2021-10-06
Supplement: 41467_2021_26101_MOESM1_ESM.pdf [file 41467_2021_26101_MOESM1_ESM.pdf]

**Supplementary Table 1: Phage and SaPI titres**

| Background                |                      | pC221                    |                         | pI258              |                    | pGO1               |                    |
|---------------------------|----------------------|--------------------------|-------------------------|--------------------|--------------------|--------------------|--------------------|
|                           |                      | Phage titre <sup>a</sup> | SaPI titre <sup>b</sup> | Phage titre        | SaPI titre         | Phage titre        | SaPI titre         |
| 80 $\alpha$               |                      | 10.02 ( $\pm$ 0.21)      | -                       | 9.74 ( $\pm$ 0.04) | -                  | 9.96 ( $\pm$ 0.05) | -                  |
| 80 $\alpha$ $\Delta$ terS |                      | <1 <sup>c</sup>          | -                       | <1                 | -                  | ND <sup>d</sup>    | -                  |
| 80 $\alpha$ ::SaPI1cpmAB  |                      | <1                       | -                       | <1                 | -                  | ND                 | -                  |
| 80 $\alpha$               | SaPI1                | 8.40 ( $\pm$ 0.21)       | 7.98 ( $\pm$ 0.37)      | 8.55 ( $\pm$ 0.21) | 7.86 ( $\pm$ 0.30) | 8.28 ( $\pm$ 0.22) | 7.64 ( $\pm$ 0.38) |
| 80 $\alpha$ $\Delta$ terS | SaPI1                | <1                       | 7.99 ( $\pm$ 0.51)      | <1                 | 8.10 ( $\pm$ 0.70) | ND                 | ND                 |
| 80 $\alpha$               | SaPI1 $\Delta$ terS  | 8.55 ( $\pm$ 0.32)       | 5.89 ( $\pm$ 0.17)      | 9.06 ( $\pm$ 0.46) | 5.75 ( $\pm$ 0.23) | ND                 | ND                 |
| 80 $\alpha$ $\Delta$ terS | SaPI1 $\Delta$ terS  | <1                       | <1                      | <1                 | <1                 | ND                 | ND                 |
| 80 $\alpha$               | SaPI1 $\Delta$ cpmAB | 9.88 ( $\pm$ 0.13)       | 9.06 ( $\pm$ 0.04)      | 9.66 ( $\pm$ 0.12) | 8.74 ( $\pm$ 0.25) | 9.75 ( $\pm$ 0.37) | 8.83 ( $\pm$ 0.31) |
| 80 $\alpha$ ::SaPI1cpmAB  | SaPI1                | <1                       | 7.01 ( $\pm$ 0.21)      | <1                 | 6.86 ( $\pm$ 0.35) | ND                 | ND                 |
| 80 $\alpha$               | SaPIbov2             | 8.25 ( $\pm$ 0.42)       | 7.79 ( $\pm$ 0.18)      | 8.08 ( $\pm$ 0.10) | 8.03 ( $\pm$ 0.22) | 8.58 ( $\pm$ 0.18) | 7.83 ( $\pm$ 0.12) |

<sup>a</sup>Mean log<sub>10</sub> Plaque-forming units (Pfu) per ml of lysate in RN4220 recipient, n = 3 ( $\pm$  std).

<sup>b</sup>Mean log<sub>10</sub> Transduction units (TrU) per ml of lysate in RN4220 recipient, n = 3 ( $\pm$  std).

<sup>c</sup>Limit of detection = 1.

<sup>d</sup>ND, Not determined.

**Supplementary Table 2: Transfer abilities of the evolved pGO1 plasmids.**

| Plasmid                  | Size (bp) | Potential for conjugative transfer <sup>a</sup>                                         | Median conjugation efficiency (range) <sup>b,c</sup>                             | Potential for transduction (< 45kb) | Mean Log <sub>10</sub> TrU per ml (±SD, n=3) <sup>d</sup> | Median transduction efficiency (range) <sup>e,f</sup>                              |
|--------------------------|-----------|-----------------------------------------------------------------------------------------|----------------------------------------------------------------------------------|-------------------------------------|-----------------------------------------------------------|------------------------------------------------------------------------------------|
| pGO1                     | 54,000    | Yes<br>( <i>tra</i> <sup>+</sup> , <i>nes</i> <sup>+</sup> , <i>oriT</i> <sup>+</sup> ) | 4.42 x 10 <sup>-4</sup><br>(3.85 x 10 <sup>-5</sup> to 5.96 x 10 <sup>-4</sup> ) | No                                  | <1                                                        | < 1.00 x 10 <sup>-8</sup>                                                          |
| pGO1evol                 | 27,574    | No<br>( <i>tra</i> <sup>-</sup> , <i>nes</i> <sup>+</sup> <i>oriT</i> <sup>+</sup> )    | < 7.5 x 10 <sup>-9</sup>                                                         | Yes                                 | 1.32 (± 0.28)                                             | 3.00 x 10 <sup>-8</sup><br>(1.00 x 10 <sup>-8</sup> to 3.00 x 10 <sup>-8</sup> )   |
| pGO1evol <sub>A</sub> *  | 41,026    | Yes<br>( <i>tra</i> <sup>+</sup> , <i>nes</i> <sup>+</sup> <i>oriT</i> <sup>+</sup> )   | 3.55 x 10 <sup>-3</sup><br>(1.50 x 10 <sup>-3</sup> to 1.55 x 10 <sup>-2</sup> ) | Yes                                 | 2.23 (± 0.26)                                             | 1.80 x 10 <sup>-7</sup><br>(9.00 x 10 <sup>-8</sup> to 3.00 x 10 <sup>-7</sup> )   |
| pGO1evol <sub>B</sub> *  | 41,026    | Yes<br>( <i>tra</i> <sup>+</sup> , <i>nes</i> <sup>+</sup> <i>oriT</i> <sup>+</sup> )   | ND                                                                               | Yes                                 | 2.42 (± 0.09)                                             | 2.80 x 10 <sup>-7</sup><br>(2.10 x 10 <sup>-7</sup> to 3.10 x 10 <sup>-7</sup> )   |
| pGO1evol <sub>C</sub> *‡ | 40,932    | No<br>( <i>tra</i> <sup>-</sup> , <i>nes</i> <sup>-</sup> <i>oriT</i> <sup>-</sup> )    | < 7.5 x 10 <sup>-9</sup>                                                         | Yes                                 | 5.03 (± 0.13)                                             | 1.12 x 10 <sup>-3</sup><br>(7.80 x 10 <sup>-4</sup> to 1.41 x 10 <sup>-3</sup> )   |
| pGO1evol <sub>F</sub> *  | 41,737    | Yes<br>( <i>tra</i> <sup>+</sup> , <i>nes</i> <sup>+</sup> <i>oriT</i> <sup>+</sup> )   | 2.63 x 10 <sup>-3</sup><br>(5.65 x 10 <sup>-5</sup> to 4.97 x 10 <sup>-3</sup> ) | Yes                                 | 2.91 (± 0.03)                                             | 8.20 x 10 <sup>-7</sup><br>(7.50 x 10 <sup>-7</sup> to 8.80 x 10 <sup>-7</sup> )   |
| pGO1evol <sub>J</sub> *‡ | 43,843    | No<br>( <i>tra</i> <sup>+</sup> , <i>nes</i> <sup>-</sup> <i>oriT</i> <sup>-</sup> )    | < 7.5 x 10 <sup>-9</sup>                                                         | Yes                                 | 7.04 (± 0.13)                                             | 9.80 x 10 <sup>-2</sup><br>(8.90 x 10 <sup>-2</sup> to 1.53 x 10 <sup>-1</sup> )   |
| pGO1evol <sub>E</sub> †  | 30,899    | No<br>( <i>tra</i> <sup>-</sup> , <i>nes</i> <sup>+</sup> <i>oriT</i> <sup>+</sup> )    | < 7.5 x 10 <sup>-9</sup>                                                         | Yes                                 | 1.16 (± 0.28)                                             | 1.00 x 10 <sup>-8</sup><br>(1.00 x 10 <sup>-8</sup> to 3.00 x 10 <sup>-8</sup> )   |
| pGO1evol <sub>H</sub> †  | 30,899    | No<br>( <i>tra</i> <sup>-</sup> , <i>nes</i> <sup>+</sup> <i>oriT</i> <sup>+</sup> )    | ND                                                                               | Yes                                 | 0.33 (± 0.58)                                             | <1.00 x 10 <sup>-8</sup><br>(<1.00 x 10 <sup>-8</sup> to 1.00 x 10 <sup>-8</sup> ) |
| pGO1evol <sub>I</sub> †  | 30,899    | No<br>( <i>tra</i> <sup>-</sup> , <i>nes</i> <sup>+</sup> <i>oriT</i> <sup>+</sup> )    | < 7.5 x 10 <sup>-9</sup>                                                         | Yes                                 | 1.80 (± 0.27)                                             | 5.00 x 10 <sup>-8</sup><br>(4.00 x 10 <sup>-8</sup> to 1.30 x 10 <sup>-7</sup> )   |

ND: Not determined; <sup>a</sup> The products of the conjugative transfer cluster genes (*tra*), relaxase (*nes*) and origin of transfer (*oriT*) are necessary for mating pore formation and translocation of plasmid DNA between cells; <sup>b</sup> Gentamicin-resistant transconjugant cells/donor cells, n = 3; <sup>c</sup> No transfer was considered to be < 7.5 x 10<sup>-9</sup>; <sup>d</sup> Transduction of 100µl of lysate into 1ml of RN4220 recipient cells; <sup>e</sup> Gentamicin-resistant transductant cells per transducing particle following infection of RN4220 recipient cells with 10<sup>8</sup> transducing particles (10<sup>7</sup> transducing particles where SaPIbov2 is present), n = 3; <sup>f</sup> No transfer was considered to be < 1.0 x 10<sup>-8</sup>; \*SaPIbov2-driven remodelling; †SaPI1Δ*cpm*AB-driven remodelling; ‡pGO1-SaPIbov2 hybrid species.

**Supplementary Table 3: Size reduction of pGO1evol forces a trade-off between mechanisms for mobilization.**

| Mating      |                              |           | Distribution of pGO1 and pGO1evol plasmids in transconjugant populations    |                                          |         |         |                                |                                                 |
|-------------|------------------------------|-----------|-----------------------------------------------------------------------------|------------------------------------------|---------|---------|--------------------------------|-------------------------------------------------|
| Donor 1     | Donor 2                      | Recipient | Median conjugation efficiency (range) <sup>a</sup>                          | Neomycin-resistant colonies <sup>b</sup> |         |         | Frequency of pGO1 transfer (%) | Frequency of pGO1evol <sub>x</sub> transfer (%) |
|             |                              |           |                                                                             | Exp't 1                                  | Exp't 2 | Exp't 3 |                                |                                                 |
| SH1000 pGO1 | SH1000 pGO1evol              | RN4220    | $2.98 \times 10^{-5}$<br>( $3.16 \times 10^{-6}$ to $1.04 \times 10^{-4}$ ) | 100/100                                  | 100/100 | 100/100 | 100.0 (± 0.00)                 | 0.00 (± 0.00)                                   |
| SH1000 pGO1 | SH1000 pGO1evol <sub>A</sub> | RN4220    | $9.83 \times 10^{-4}$<br>( $6.56 \times 10^{-4}$ to $6.29 \times 10^{-3}$ ) | 19/100                                   | 9/100   | 33/100  | 20.3 (± 12.1)                  | 79.7 (± 12.1)                                   |
| SH1000 pGO1 | SH1000 pGO1evol <sub>F</sub> | RN4220    | $8.36 \times 10^{-4}$<br>( $6.05 \times 10^{-4}$ to $1.22 \times 10^{-3}$ ) | 100/100                                  | 100/100 | 100/100 | 100.0 (± 0.00)                 | 0.00 (± 0.00)                                   |
| SH1000 pGO1 | SH1000 pGO1evol <sub>E</sub> | RN4220    | $2.12 \times 10^{-4}$<br>( $4.16 \times 10^{-5}$ to $2.30 \times 10^{-4}$ ) | 100/100                                  | 100/100 | 100/100 | 100.0 (± 0.00)                 | 0.00 (± 0.00)                                   |
| SH1000 pGO1 | SH1000 pGO1evol <sub>I</sub> | RN4220    | $1.60 \times 10^{-6}$<br>( $1.17 \times 10^{-6}$ to $1.69 \times 10^{-4}$ ) | 34/34                                    | 43/43   | 100/100 | 100.0 (± 0.00)                 | 0.00 (± 0.00)                                   |

<sup>a</sup> Three independent mating experiments were carried out for each donor combination; <sup>b</sup> Neomycin resistance was used to differentiate pGO1 from the derivative plasmids as all pGO1evol<sub>x</sub> plasmids are sensitive to neomycin.

**Supplementary Table 4: Bacterial strains and plasmids**

| Strain      | Description                                                                                            | Reference  |
|-------------|--------------------------------------------------------------------------------------------------------|------------|
| RN450       | <i>Staphylococcus aureus</i> NCTC8325 cured of $\phi$ 11, $\phi$ 12 and $\phi$ 13                      | 1          |
| RN4220      | Restriction-deficient derivative of RN450                                                              | Lab strain |
| SH1000      | <i>rsbU</i> <sup>+</sup> derivative of <i>S. aureus</i> NCTC8325-4                                     | Lab strain |
| RN10359     | RN450 80 $\alpha$                                                                                      | 2          |
| SH1000 pGO1 | SH1000 pGO1                                                                                            | 3          |
| JP20320     | SH1000 80 $\alpha$                                                                                     | This study |
| JP19979     | SH1000 pGO1 80 $\alpha$                                                                                | This study |
| JP19994     | JP19979 SaPI1 <i>tst::tetM</i>                                                                         | This study |
| JP19996     | JP19979 SaPIbov2 <i>bap::tetM</i>                                                                      | This study |
| JP21467     | RN4220 80 $\alpha$ pGO1evol <sub>A</sub>                                                               | This study |
| JP21468     | RN4220 80 $\alpha$ pGO1evol <sub>B</sub>                                                               | This study |
| JP21469     | RN4220 pGO1evol <sub>C</sub> ::SaPIbov2 <i>bap::tetM</i>                                               | This study |
| JP21470     | RN4220 pGO1evol <sub>F</sub>                                                                           | This study |
| JP21471     | RN4220 pGO1evol <sub>J</sub> ::SaPIbov2 <i>bap::tetM</i>                                               | This study |
| JP21472     | RN4220 pGO1evol <sub>E</sub>                                                                           | This study |
| JP21473     | RN4220 pGO1evol <sub>H</sub>                                                                           | This study |
| JP21474     | RN4220 pGO1evol <sub>I</sub>                                                                           | This study |
| JP19881     | RN4220 80 $\alpha$ pGO1evol                                                                            | This study |
| JP20000     | SH1000 pGO1evol                                                                                        | This study |
| JP20050     | JP20320 pGO1evol                                                                                       | This study |
| JP21271     | SH1000 pGO1evol <sub>A</sub>                                                                           | This study |
| JP21272     | SH1000 pGO1evol <sub>C</sub> ::SaPIbov2 <i>bap::tetM</i>                                               | This study |
| JP21273     | SH1000 pGO1evol <sub>F</sub>                                                                           | This study |
| JP21274     | SH1000 pGO1evol <sub>J</sub> ::SaPIbov2 <i>bap::tetM</i>                                               | This study |
| JP21275     | SH1000 pGO1evol <sub>E</sub>                                                                           | This study |
| JP21276     | SH1000 pGO1evol <sub>I</sub>                                                                           | This study |
| JP14151     | RN4220 SAOUHSC 00390:: <i>cadCA</i> ; Cd <sup>R</sup> marker 10 kb downstream SaPI type II <i>attB</i> | This study |
| JP19998     | JP14151, spontaneous rifampicin-resistant mutant                                                       | This study |
| JP20580     | JP20320 pGO1evol <sub>A</sub>                                                                          | This study |
| JP20581     | JP20320 pGO1evol <sub>B</sub>                                                                          | This study |
| JP20582     | JP20320 pGO1evol <sub>C</sub> ::SaPIbov2 <i>bap::tetM</i>                                              | This study |
| JP20585     | JP20320 pGO1evol <sub>E</sub>                                                                          | This study |
| JP20583     | JP20320 pGO1evol <sub>F</sub>                                                                          | This study |
| JP20586     | JP20320 pGO1evol <sub>H</sub>                                                                          | This study |
| JP20587     | JP20320 pGO1evol <sub>I</sub>                                                                          | This study |
| JP20584     | JP20320 pGO1evol <sub>J</sub> ::SaPIbov2 <i>bap::tetM</i>                                              | This study |
| ST126       | RN4220 80 $\alpha$ SaPI1 <i>tst::tetM</i> $\Delta$ <i>cpmAB</i>                                        | 4          |

|         |                                                      |            |
|---------|------------------------------------------------------|------------|
| JP19997 | JP20320 SaPI1 <i>tst::tetM</i> $\Delta$ <i>cpmAB</i> | This study |
| JP18286 | RN4220 pI258                                         | 5          |
| JP18292 | JP18286 80 $\alpha$                                  | This study |
| JP18410 | JP18292 SaPI1 <i>tst::tetM</i>                       | This study |
| JP18413 | JP18292 SaPI <sub>bov2</sub> <i>bap::tetM</i>        | This study |
| JP12871 | RN4220 80 $\alpha$ $\Delta$ <i>terS</i>              | This study |
| JP18208 | JP12871 pI258                                        | This study |
| JP18661 | JP18208 SaPI1 <i>tst::tetM</i>                       | This study |
| JP18693 | JP18292 SaPI1 <i>tst::tetM</i> $\Delta$ <i>terS</i>  | This study |
| JP18694 | JP18208 SaPI1 <i>tst::tetM</i> $\Delta$ <i>terS</i>  | This study |
| JP18525 | JP18292 SaPI1 <i>tst::tetM</i> $\Delta$ <i>cpmAB</i> | This study |
| ST82    | RN4220 80 $\alpha$ ::SaPI1 <i>cpmAB</i>              | 4          |
| JP18669 | ST82 pI258                                           | This study |
| JP18692 | JP18669 SaPI1 <i>tst::tetM</i>                       | This study |
| JP18288 | RN4220 pC221                                         | 6          |
| JP18293 | JP18288 80 $\alpha$                                  | This study |
| JP18665 | JP18293 SaPI1 <i>tst::tetM</i> $\Delta$ <i>cpmAB</i> | This study |
| JP18406 | JP18293 SaPI1 <i>tst::tetM</i>                       | This study |
| JP18408 | JP18293 SaPI <sub>bov2</sub> <i>bap::tetM</i>        | This study |
| JP18425 | JP12871 pC221                                        | This study |
| JP18865 | JP18425 SaPI1 <i>tst::tetM</i>                       | This study |
| JP18866 | JP18293 SaPI1 <i>tst::tetM</i> $\Delta$ <i>terS</i>  | This study |
| JP18867 | JP18425 SaPI1 <i>tst::tetM</i> $\Delta$ <i>terS</i>  | This study |
| JP19946 | ST82 pC221                                           | This study |
| JP19950 | JP19946 SaPI1 <i>tst::tetM</i>                       | This study |
| JP1220  | <i>Staphylococcus xylosus</i>                        | Lab strain |
| JP831   | <i>Staphylococcus epidermidis</i> BM96184            | Lab strain |
| JP7422  | <i>Listeria monocytogenes</i> SK1351                 | Lab strain |
| JP21894 | RN4220, spontaneous rifampicin-resistant mutant      | This study |
| JP21480 | RN450 pC221                                          | This study |
| JP21924 | JP21480 SaPI1 <i>tst::tetM</i>                       | This study |
| JP21481 | RN10359 pC221                                        | This study |
| JP21925 | JP21481 SaPI1 <i>tst::tetM</i>                       | This study |

---

| <b>Plasmid</b> | <b>Description</b>                                                                                                                                             | <b>Reference</b> |
|----------------|----------------------------------------------------------------------------------------------------------------------------------------------------------------|------------------|
| pGO1           | <i>S. aureus</i> conjugative plasmid, 54 kb; confers resistance to bleomycin, gentamicin, kanamycin, neomycin, quaternary ammonium compounds, and trimethoprim | <sup>3</sup>     |
| pI258          | <i>S. aureus</i> plasmid, 29 kb; confers resistance to erythromycin, cadmium, arsenic, and mercury                                                             | <sup>7</sup>     |
| pC221          | <i>S. aureus</i> mobilizable plasmid, 4.6 kb; confers resistance to chloramphenicol                                                                            | <sup>6</sup>     |

**Supplementary Table 5: Oligonucleotides**

| Primer                                           | Sequence (5'-3')                              | Description                                                |
|--------------------------------------------------|-----------------------------------------------|------------------------------------------------------------|
| Differentiation of pGO1 and pGO1evolved plasmids |                                               |                                                            |
| pGO1_p01-F                                       | GATAACAACAAAAACGAATAATATAGGAGGGGTT            | Region common to both pGO1 and pGO1-derivatives            |
| pGO1_p01-R                                       | GTTACCCACCTCTTTAATACTGTAGGCTA                 |                                                            |
| pGO1-1F                                          | CACTCAACTATTATGAGAAGAAAAATATGGAAAACA<br>ATCCA | PCR for differentiation of pGO1 and pGO1evol               |
| pGO1_42317-R                                     | GTCTTGATAGTTAGGTAACATTCCTATTGAGTG             |                                                            |
| pGO1-Frag21F                                     | TTGCAATATTGAAAGGAACACCTAAAAATATATCAGC<br>AC   | PCR for differentiation of pGO1 and pGO1evol <sub>A</sub>  |
| pGO1-Frag21R                                     | TTTCTCAGCATAATTAATGGCCCGTGATG                 |                                                            |
| Southern blot DNA probes                         |                                               |                                                            |
| pGO1_GmR-F                                       | AGAGCCAAATTATTGGAGTAAAGGAATTGG                | <i>aacA-aphD</i> (gentamicin-resistance) probe             |
| pGO1_GmR-R                                       | TATCTGTATAATCTAAACCGTGCATTTGTC                |                                                            |
| pGO1_nes-F                                       | TTTGTGGAATAAAGTTCATGATGTTGAGAACAGA            | <i>nes</i> probe                                           |
| pGO1_Frag4R                                      | TTCATCTTCAAATTTTCGTGCTTTCCAACC                |                                                            |
| tetM-1mS                                         | ACGCGTCGACCAAATATGCTCTTACGTGC                 | <i>tetM</i> (SaPI <sub>bov2</sub> <i>bap::tetM</i> ) probe |
| REV tetM mid                                     | CATCAACATGAGCTAAAACCTCCAA                     |                                                            |

**References**

1. Novick, R. Properties of a cryptic high-frequency transducing phage in *Staphylococcus aureus*. *Virology* **33**, 155–166 (1967).
2. Christie, G. E. *et al.* The complete genomes of *Staphylococcus aureus* bacteriophages 80 and 80 $\alpha$ --implications for the specificity of SaPI mobilization. *Virology* **407**, 381–390 (2010).
3. Caryl, J. A. & O'Neill, A. J. Complete nucleotide sequence of pGO1, the prototype conjugative plasmid from the Staphylococci. *Plasmid* **62**, 35–38 (2009).
4. Damle, P. K. *et al.* The roles of SaPI1 proteins gp7 (CpmA) and gp6 (CpmB) in capsid size determination and helper phage interference. *Virology* **432**, 277–282 (2012).
5. Wang, P. Z. & Novick, R. P. Nucleotide sequence and expression of the beta-lactamase gene from *Staphylococcus aureus* plasmid pI258 in *Escherichia coli*, *Bacillus subtilis*, and *Staphylococcus aureus*. *J. Bacteriol.* **169**, 1763–1766 (1987).

6. Projan, S. J. *et al.* Comparative sequence and functional analysis of pT181 and pC221, cognate plasmid replicons from *Staphylococcus aureus*. *Mol. Gen. Genet.* **199**, 452–464 (1985).
7. Laddaga, R. A., Chu, L., Misra, T. K. & Silver, S. Nucleotide sequence and expression of the mercurial-resistance operon from *Staphylococcus aureus* plasmid p1258. *Proc. Natl. Acad. Sci. U.S.A.* **84**, 5106–5110 (1987).



**a**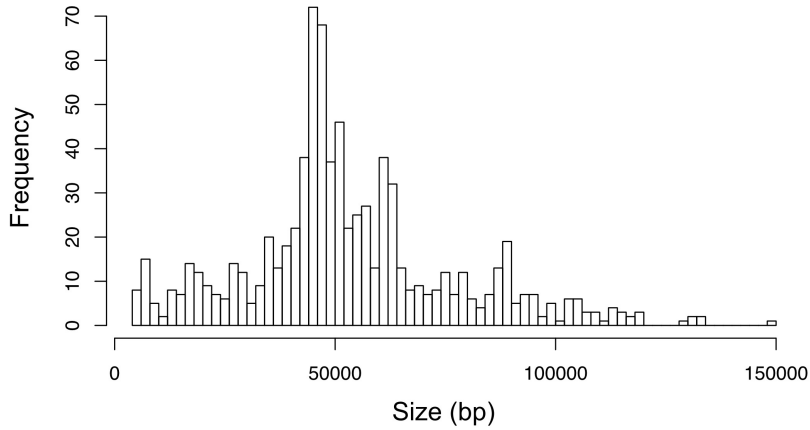**b**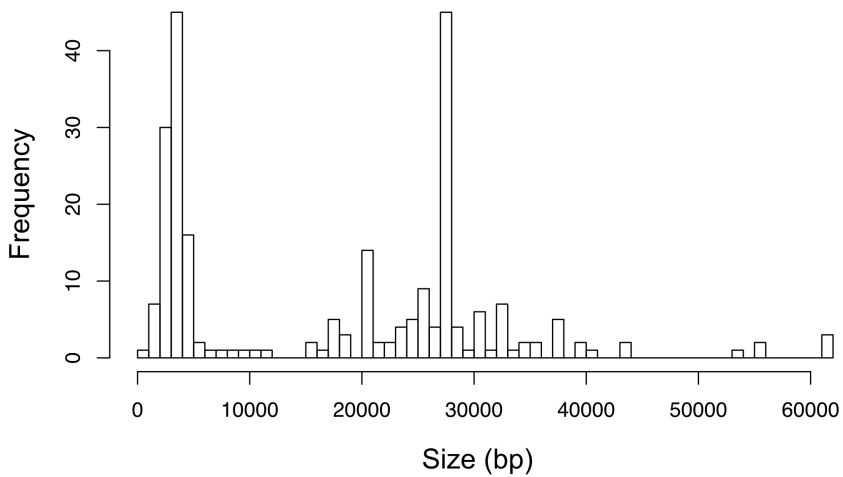

**Supplementary Figure 1. Staphylococcal plasmids display bimodal size distribution.** 295 complete *S. aureus* sequences were downloaded from the NCBI database and screened for the presence of prophages (n=813) and plasmids (n=243). **(a)** Prophage genomes ranked according to size. **(b)** Plasmid sequences ranked according to size. Almost all plasmids were below 45 kb, which is consistent with phage capsid capacity. Prophages display unimodal distribution with a peak at 44 kb, while plasmid sequences reveal a clear bimodal size distribution with peaks at 4 kb and 27 kb.

Unconserved 0 1 2 3 4 5 6 7 8 9 10 Conserved

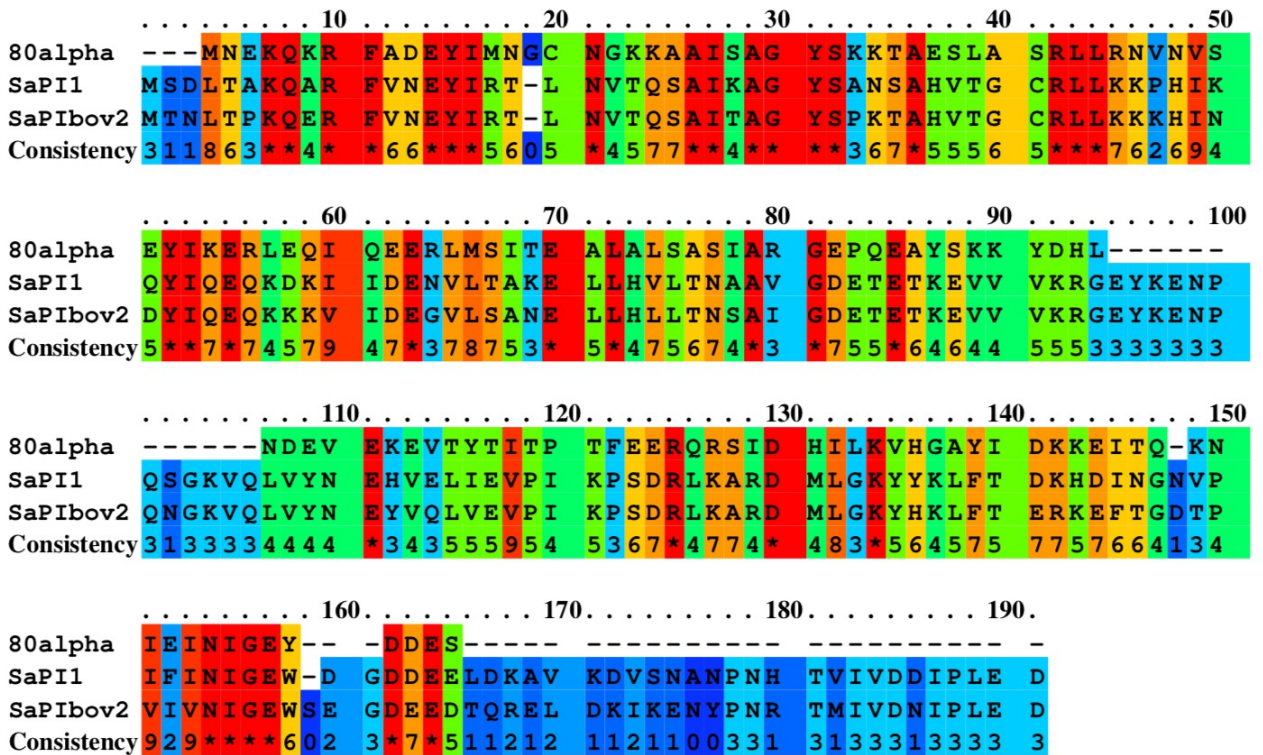

**Supplementary Figure 2. Comparison of phage 80 $\alpha$  and SaPI small terminase sequences.** Small terminase (TerS) amino acid sequences from phage 80 $\alpha$ , SaPI1 and SaPIbov2 aligned using PRALINE software.
