# Supplementary material for: Staphylococcal phages and pathogenicity islands drive plasmid evolution
Source: PubMed Central journal article supplement (PMC8494744; doi:10.1038/s41467-021-26101-5), 2021-10-06
Supplement: 41467_2021_26101_MOESM3_ESM.pdf [file 41467_2021_26101_MOESM3_ESM.pdf]

## Description of Additional Supplementary Files

File Name: Supplementary Data 1

Description: Deleted regions from evolved pGO1 plasmids.

File Name: Supplementary Data 2

Description: Presence of plasmids, SaPIs and prophages in *S. aureus*.
